# Supplementary material for: Hepatoprotective effect of syringin combined with costunolide against LPS-induced acute liver injury in L-02 cells via Rac1/AKT/NF-κB signaling pathway
Source: publisher site journal article supplement (doi:10.18632/aging.205161), 2023-11-01
Supplement: Supplementary file [file aging-v15i21-205161-supplementary-material-SD1.pdf]

## SUPPLEMENTARY FIGURES

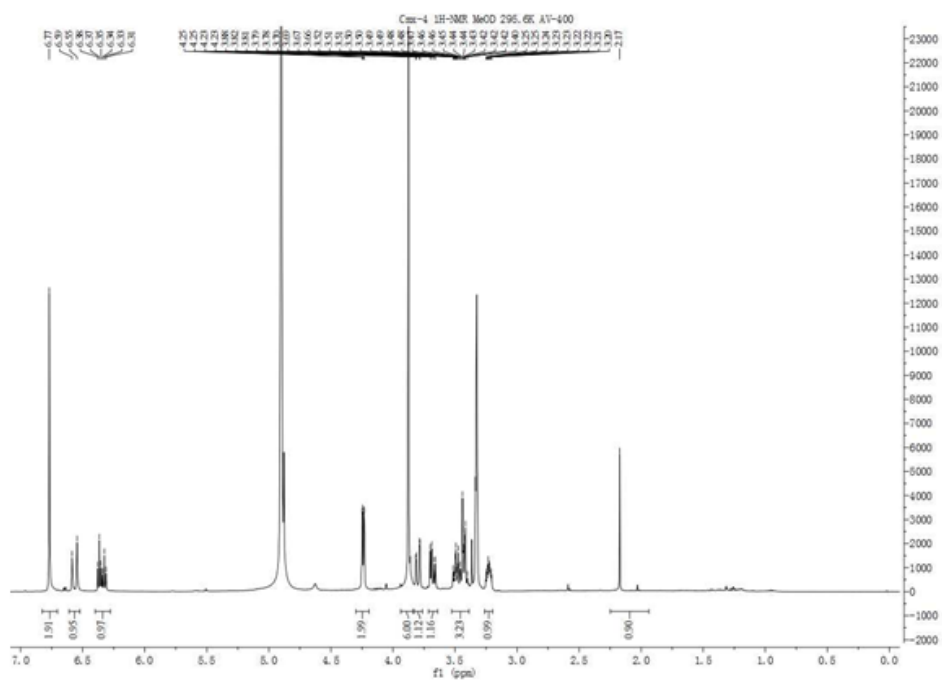

Supplementary Figure 1. The  $^1\text{H}$ -NMR spectra of compound syringin.

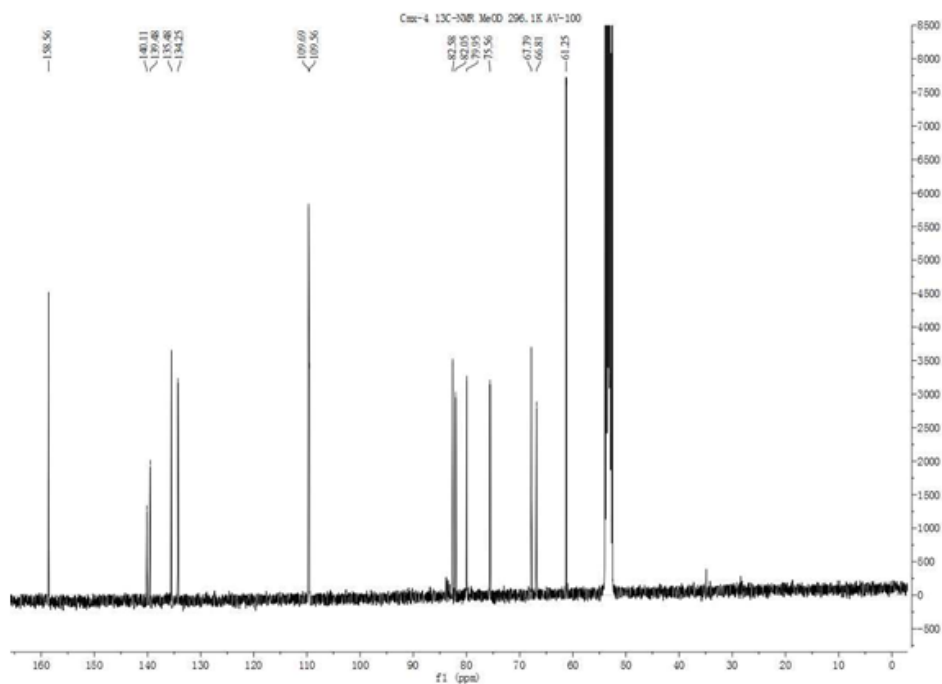

Supplementary Figure 2. The  $^{13}\text{C}$ -NMR spectra of compound syringin.

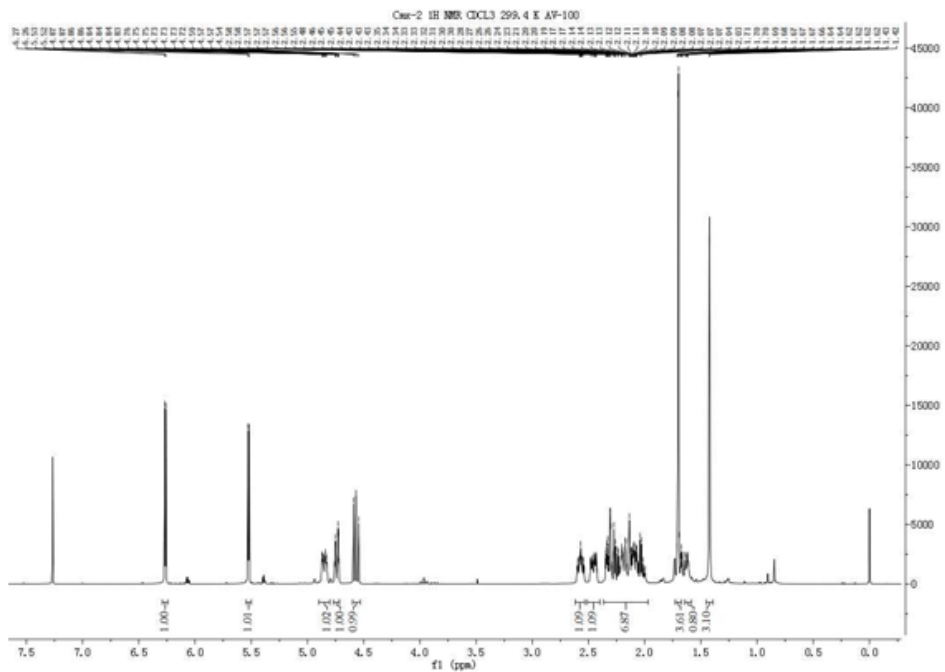

Supplementary Figure 3. The  $^1\text{H}$ -NMR spectra of compound costunolide.

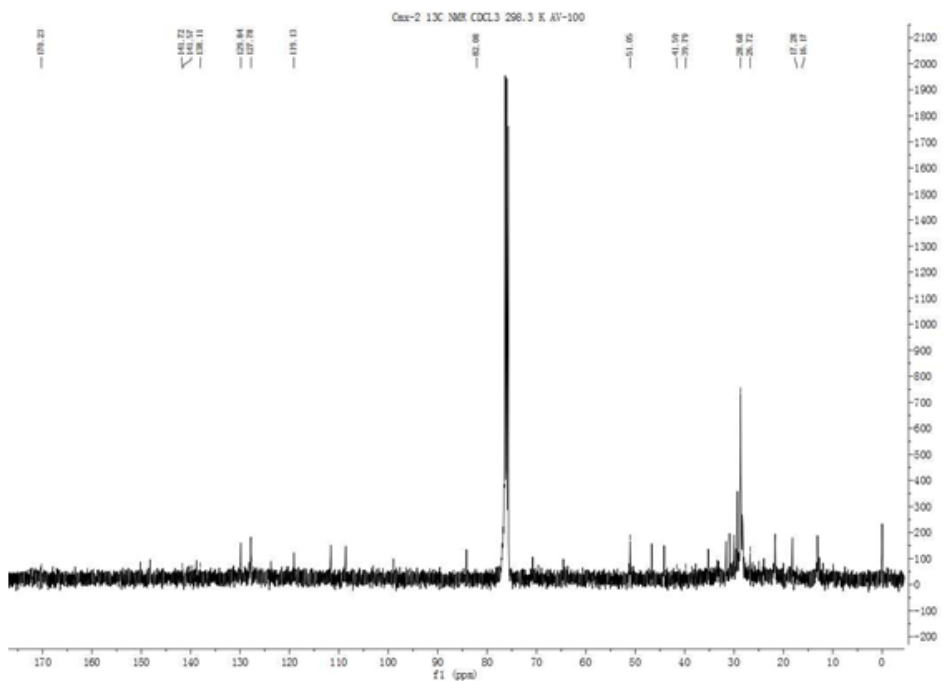

Supplementary Figure 4. The  $^{13}\text{C}$ -NMR spectra of compound costunolide.

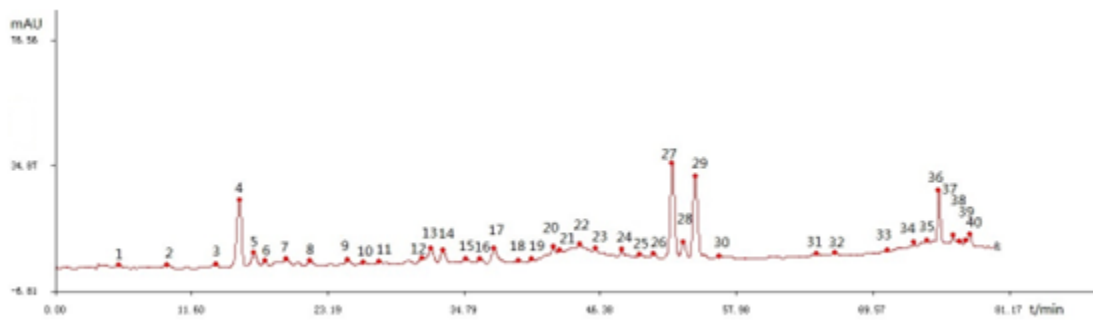

Supplementary Figure 5. The reference fingerprint of *Dolomiaea souliei* (Franch.) C.Shih.

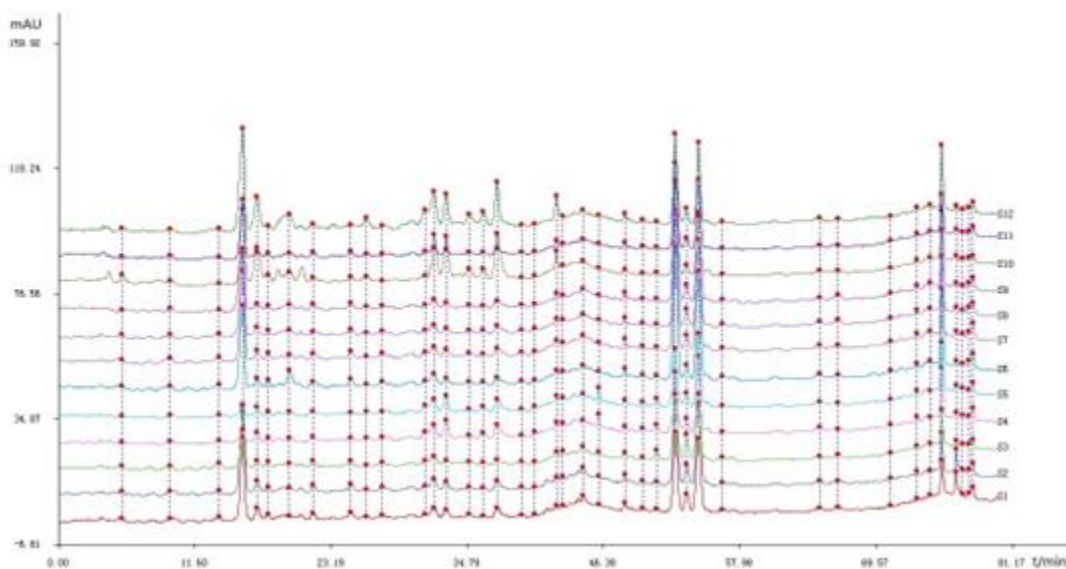

Supplementary Figure 6. HPLC fingerprints for 12 batches of *Dolomiaea souliei* (Franch.) C.Shih.
