# Supplementary material for: Hepatoprotective effect of syringin combined with costunolide against LPS-induced acute liver injury in L-02 cells via Rac1/AKT/NF-κB signaling pathway
Source: publisher site journal article supplement (doi:10.18632/aging.205161), 2023-11-01
Supplement: Supplementary file [file aging-v15i21-205161-supplementary-material-SD2.pdf]

## SUPPLEMENTARY FILES

**Supplementary File 1. Chemical property of compound syringin.**

### ACS of syringin: 118-34-3

Syringin, white powder, molecular weight: 372.37, melting point: 174-177° C.

<sup>1</sup>H-NMR (MeOD, 400 MHz)  $\delta$ : 6.66 (2H, s, H-2, H-6), 6.45 (1H, d,  $J=15.9$  Hz, H-7), 6.23 (1H, dt,  $J=15.8, 5.5$  Hz, H-8), 4.85 (1H, d,  $J=7.8$  Hz, H-1'), 4.13 (2H, dd,  $J=5.6, 1.6$  Hz, H-9), 3.80 (6H, s, 3,5-OCH<sub>3</sub>), 3.76 (1H, dd,  $J=12.0, 2.0$  Hz, H-6'a), 3.56 (1H, dd,  $J=12.0, 5.2$  Hz, H-6'b), 3.33 (1H, m, H-2'), 3.37 (2H, m, H-4', H-5'), 3.20 (1H, m, H-3').

<sup>13</sup>C-NMR (MeOD, 100 MHz)  $\delta$ : 135.89 (C-1), 105.47 (C-2, C-6), 154.34 (C-3,5), 135.26 (C-4), 131.26 (C-7), 130.04 (C-8), 63.57 (C-9), 105.34 (C-1'), 75.73 (C-2'), 78.36 (C-3'), 71.34 (C-4'), 77.82 (C-5'), 62.59 (C-6'), 57.03 (3,5-OCH<sub>3</sub>).

**Supplementary File 2. Chemical property of compound costunolide.**

### ACS of costunolide: 553-21-9

Costunolide, white powder, molecular weight: 232.32, melting point: 106-107° C.

<sup>1</sup>H-NMR (CDCl<sub>3</sub>, 400 MHz)  $\delta$ : 6.26 (1H, d,  $J=3.6$  Hz, H-13a), 5.52 (1H, d,  $J=3.2$  Hz, H-13b), 4.85 (1H, dd,  $J=11.6, 4.3$  Hz, H-1), 4.74 (1H, d,  $J=10$  Hz, H-5), 4.57 (1H, t,  $J=9.9$  Hz, H-6), 1.70 (3H, s, H-15), 1.42 (3H, s, H-14) <sup>13</sup>C-NMR (CDCl<sub>3</sub>, 100 MHz)  $\delta$ : 127.78 (C-1), 28.68 (C-2), 41.59 (C-3), 141.57 (C-4), 129.84 (C-5), 82.08 (C-6), 51.05 (C-7), 26.72 (C-8), 39.79 (C-9), 138.11 (C-10), 141.72 (C-11), 170.23 (C-12), 119.13 (C-13), 16.17 (C-14), 17.28 (C-15).
